# Supplementary material
Source: publisher figshare collection journal article supplement (https://aacr.figshare.com/articles/dataset/_/22930503)

# Figure S4

## A

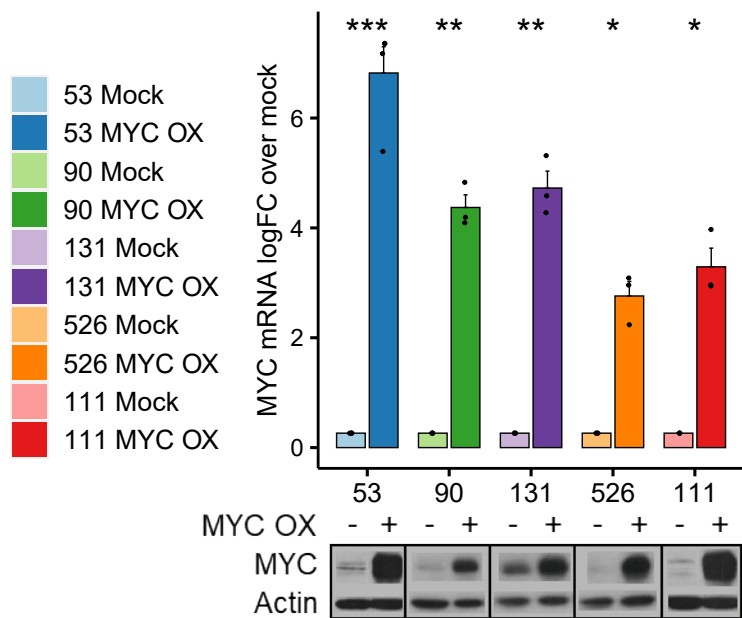

## C

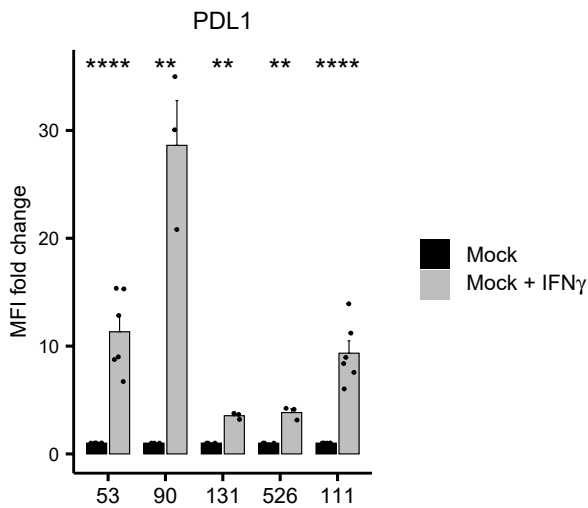

## D

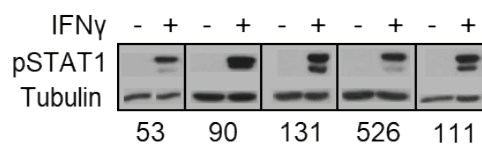

## B

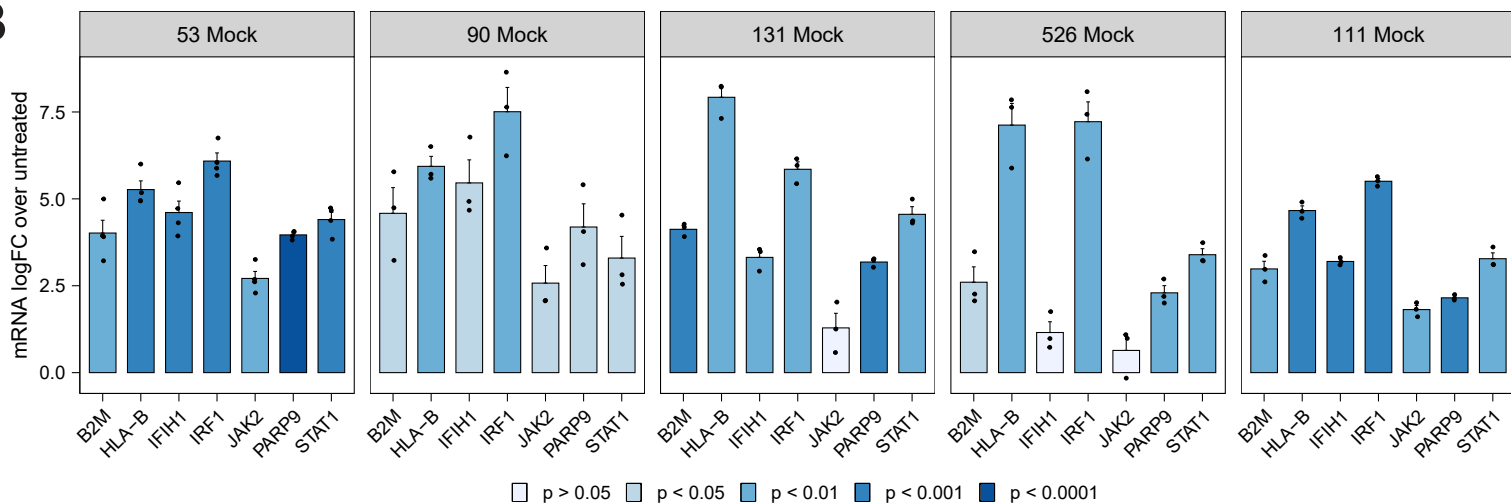

## E

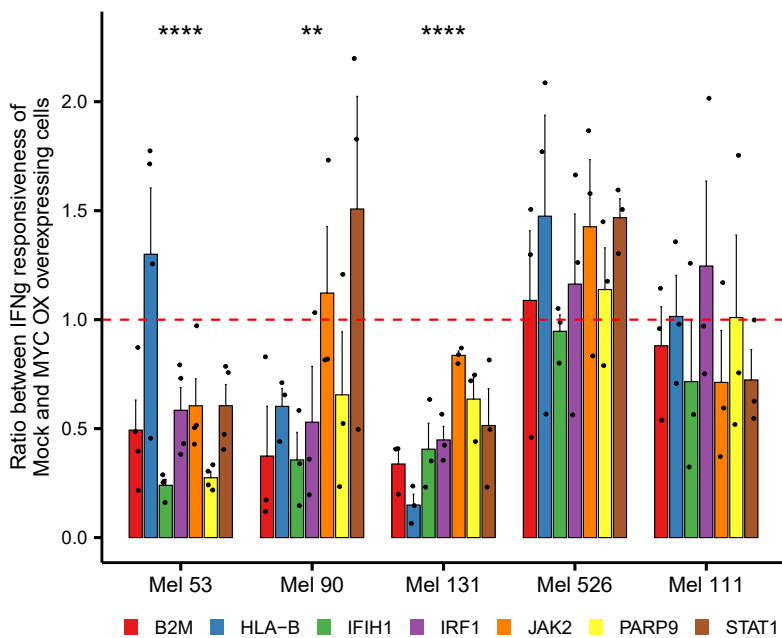

## F

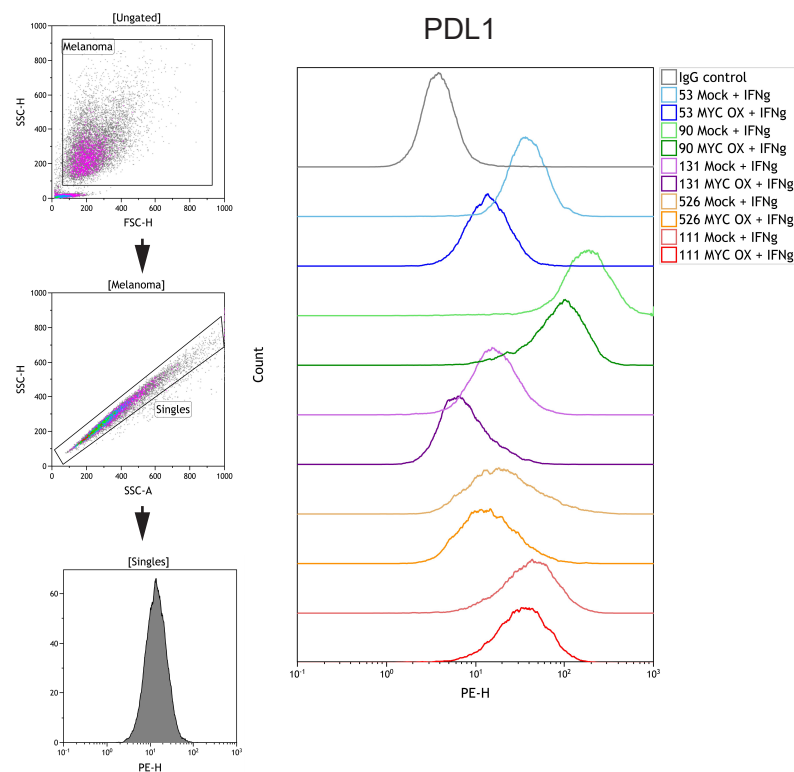

Supplement: Supplementary file 1 [file 40665087]
